# Supplementary material
Source: PubMed Central journal article supplement (PMC2891610)

**Haberman et al., Supplemental material for “Prominent hippocampal CA3 gene expression profile in neurocognitive aging”**

**Supplemental Text**

**Methods**

*Behavioral characterization:* Behavioral assessment of memory function in a Morris water maze task, was conducted as previously described (Gallagher et al., 1993). Briefly, the water maze consisted of a circular pool surrounded by white curtains with black patterns affixed to provide a configuration of spatial cues. The rats were trained for eight days (three trials per day) to locate a camouflaged escape platform that remained at the same location throughout training. Every sixth trial consisted of a probe trial (free swim with no escape platform) that served to assess the development of a spatially localized search for the escape platform. During these probe trials, a learning index was generated from the proximity of the rat to the escape platform and was used to define impairment in the rats. The learning index is the sum of weighted proximity scores obtained during probe trials, with low scores reflecting searches near the escape platform and high scores reflecting searches farther away from the platform (Gallagher et al., 1993). Aged rats performing within the range of young are designated aged unimpaired (AU) whereas those performing worse than young are considered aged impaired (AI). Cue training

(visible escape platform) occurred on the last day of training to test for sensorimotor and motivational factors independent of spatial learning.

*Hippocampal Dissection:* 26 rats (16 aged, 10 young) were sacrificed two weeks after completion of all behavioral testing by rapid decapitation, and brains removed from the skull. Brains were then chilled in ice cold PBS and all further manipulations performed on a cold plate. Whole hippocampi were dissected out and 400  $\mu\text{m}$  sections were sliced throughout the entire rostral-caudal extent of the hippocampus. The CA1, CA3 and dentate gyrus were microdissected by hand under a dissecting microscope. Sub-regional boundaries were clearly visible under these conditions. Tissue for each region was pooled across hemispheres of the same animal, frozen on dry ice and then stored at  $-80^{\circ}\text{C}$ . RNA from each subregion of individual animals was processed and hybridized to separate arrays.

*RNA Quality Control, cRNA Labeling, and Microarray Hybridization:* RNA samples were sent to the The Johns Hopkins Microarray core facility for quality assessment, cRNA labeling, and hybridization to Affymetrix RAE230A microarrays. RNA quality was assessed using Agilent Bioanalyzer. Ribosomal RNA ratio (28S:18S around 2.0) as well as RNA integrity number ( $\text{RIN} > 7.0$ ) were used to verify RNA quality. All samples met quality standards for microarray analysis.

cRNA labeling from RNA samples was performed following Affymetrix specifications. Briefly, 5  $\mu\text{g}$  of total RNA was used to synthesize first strand cDNA using oligonucleotide probes with 24 oligo-dT plus T7 promoter as primer (Proligo LLC), and

the SuperScript Choice System (Invitrogen). Following the double stranded cDNA synthesis, the product was purified by phenol-chloroform extraction, and biotinilated anti-sense cRNA was generated through *in vitro* transcription using the BioArray RNA High Yield Transcript Labelling kit (ENZO Life Sciences Inc). 15 µg of the biotinilated cRNA was fragmented at 94°C for 35 min (100mM Tris-acetate, pH 8.2, 500mM KOAc, 150mM MgOAc), and 10µg of total fragmented cRNA was hybridized to the Affymetrix GeneChip arrays for 16hr at 45°C with constant rotation (60 rpm). Affymetrix Fluidics Station 450 was then used to wash and stain the Chips, removing the non-hybridized target and incubating with a streptavidin-phycoerythrin conjugate to stain the biotinilated cRNA. The staining was then amplified using goat IgG as blocking reagent and biotinilated anti-streptavidin antibody (goat), followed by a second staining step with a streptavidin-phycoerythrin conjugate. Fluorescence was detected using the Affymetrix G3000 GeneArray Scanner and image analysis of each GeneChip was done through the GeneChip Operating System 1.1.1 (GCOS) software from Affymetrix, using the standard default settings.

*Microarray Data Quality Control and Normalization:* All quality control, normalization, differential expression, and exploratory analysis of microarray data were performed using the open-source R statistical language (<http://www.r-project.org/>). Raw CEL files from individual hybridizations were imported using the "affy" package in the Bioconductor (Irizarry et al., 2003)(<http://www.bioconductor.org/>) collection of R packages. Quality of microarray data was assessed on many levels: RNA degradation plots were created to examine signal intensities of probes on the microarray as a function of their 3' - 5'

position in the transcript being interrogated. This serves primarily as a post-experiment inspection of RNA quality/integrity. Raw, log<sub>2</sub>, and normalized (see below) intensities and ratios to mean intensities were inspected using boxplots, density estimates, and scatter plots in order to check for intensity-based artifacts. Chip pseudo images were created from both intensity and ratio data in order to detect any spatial hybridization artifacts. Several dimension reducing algorithms, including principal component analysis (PCA), multidimensional scaling (MDS), and clustering were used to assess variance globally across all expression measures and to identify outlier microarrays. Based on these data, 5 arrays were excluded from further analysis (1 AU in each of CA1, CA3 and dentate gyrus as well as 1 Y and 1 AI dentate gyrus array) resulting in 6 AU, 8AI and 9Y arrays for CA1 and CA3 and 6 AU, 7 AI and 8Y arrays for dentate gyrus. The "germa" package in Bioconductor was used to normalize microarray data following quality control procedures. This involves background correction, quantile normalization, and probeset summarization.

*Differential Expression of Individual Genes:* Significance Analysis in Microarrays d-statistics (Tusher et al., 2001) were used to assess differential expression across groups of animals. This entails a moderated T-statistic which borrows variance information across genes in order to increase statistical power and to avoid the tendency to find low variance expression changes significant. In addition, an empirically determined low intensity limit was used. This limit was determined by inspecting differential expression statistics across the range of intensity measures. As is common in Affymetrix data normalized with GCRMA, there was a clear level below which differential expression statistics showed

markedly different behavior with regards to variance and bias yielding a bimodal distribution of intensities in the  $\log_2$  scale. In all three datasets, this distribution had a clear minimum between the two modes where we placed our low-intensity cut-off. In this case it was at a value of 5 in the  $\log_2$  scale for all datasets. Expression values below this limit were omitted from the analysis of differential expression of individual genes.

Because GCRMA includes quantile normalization, each of the arrays will have a near identical distribution of intensities and hence this cut-off is appropriate for all arrays. In order to assess differential expression associated with specific phenotypes subjects were grouped together for specific comparison: age phenotype (Y vs AU+AI), impaired phenotype (AI v AU+Y) and cognition within aging (AI v AU). Numbers of probesets with SAM p-value  $< 0.05$  are listed in Table S2. To control for false positives introduced by large numbers of comparisons, false discovery rate (FDR) analysis was used to create gene lists containing a precisely estimated proportion of false hits. This is achieved by comparing the observed differential expression statistics to those expected by chance. Those expected by chance are estimated by permuting the group labels of the data many times and recalculating differential expression statistics.

*Multidimensional Scaling analysis (MDS):* Using all 15,923 gene expression measures generated from each microarray, the pair-wise correlation ( $r$ ) between all possible sample pairs was calculated. An MDS algorithm was used to represent all pair-wise distances (defined to be  $1-r$ ) such that each sample was visualized as a single point in 2D space.

*In situ probe generation:* BIP/GRP78/HSPA5, and calreticulin riboprobe template constructs were generated by PCR amplification from rodent hippocampal cDNA. Two sets of primers were used for each gene such that appropriate overhangs were generated after dissociation and re-annealing of the amplified products (Zeng, 1998); BIP primers: Left A: 5'agcttcaggatgcagacattgaagac, Left B: 5'tcaggatgcagacattgaagac, Right A: 5'catccaaggtgaacacacacc, Right B: 5'aattcatccaaggtgaacacacacc; Calreticulin primers: Left A: 5'agcttgactgggcttagacctctgg, Left B: 5'tgtactgggcttagacctctgg, Right A: 5'cgctctacagctcatccttg, Right B: 5'aattcgctctacagctcatccttg. The resulting templates were cloned into the EcoRI and HindIII sites of pGEM7zf+ (Promega). Lpl , Gabra 5, Tcp1 probes were generated by PCR amplification from rodent hippocampal cDNA (Lpl primers – left: 5'cctgactccaatgtcattgtag , right 5'acttcaccagctggccacatc; Gabra5 primers – left: 5'gaatctgtcccagctaggac, right: 5'ctctcagaagtcttctctc ; TCP1 primers -left: 5'ggagaggatttgtgacgatg, right: 5'gctcttaacttggaaccag) followed by a second round of amplification with primers containing Sp6 and T7 polymerase binding sites. <sup>35</sup>S-UTP labeled riboprobes were generated using the Maxiscript kit (Ambion) according to manufacturer's directions. The probe was then phenol/choloroform extracted, ethanol precipitated at -80°C, and resuspended in RNase-free water.

*In situ hybridization:* Aged and young rats were behaviorally characterized using the same protocol as for the microarray. For LPL and GABRA5 resulting Ns were 5Y, 5AU and 6AI and for Tcp1, BiP and Calr, Ns were 5Y, 6AU and 6AI. The rats were anesthetized with isoflurane and transcardially perfused with 0.1 M phosphate buffer saline at room temperature followed by ice-cold 4% paraformaldehyde (PFA) in 0.1 M

phosphate buffer (PB). Brains were removed and post-fixed in 4% PFA at 4°C for an additional 24 hr, and then transferred to 20% sucrose in 4% PFA at 4°C for another 24 hr. The brains were then stored at -80°C until sectioning. Blocks of brains containing the hippocampus were sectioned at 30 µm thickness, and stored free-floating in 4% PFA for at least 3 weeks. All sections for each gene analysis were hybridized simultaneously using a single probe preparation. Prior to hybridization, brain sections were washed twice in 0.75% glycine in 0.1 M PB, once in 0.1 M PB, and then incubated in Proteinase K (1 mg/ml) for 30 min at 37°C. The Proteinase K reaction was stopped by a 10 minute incubation in acetic anhydride solution (1.3% Triethanolamine, 0.25% Acetic anhydride, 0.04 M Acetic acid) followed by 2 washes in 2X SSC (20X = 3 M sodium chloride and 0.3 M sodium citrate). Sections were hybridized overnight at 60°C in hybridization buffer (20% formamide, 0.4X Denhardt's solution, 4% dextran sulfate and 1.6X SSC) supplemented with 0.25 mg/ml tRNA, 0.33 mg/ml sheared salmon sperm DNA, 100 mM Dithiothreitol (DTT) and  $1 \times 10^7$  cpm/ml <sup>35</sup>S-UTP labeled probe. After hybridization, sections were washed at 60°C in 4X SSC/0.01 M DTT twice and once in 2X SSC/ 50% formamide. They were then washed twice in RNase buffer (5 mM Tris at pH 8.0, 0.5 M sodium chloride, and 1 mM EDTA) and incubated with RNase (20 µg/ml) at 37°C for 30 minutes. Sections were washed twice at room temperature in 2X SSC, and twice each in 0.5X SSC and 0.1X SSC at 60°C before mounting onto slides. Slides were dried overnight and exposed to a phosphorimager screen, and analyzed with ImageQuant (Amersham Biosciences). Processing and analyzing of the brain sections were done blind to experimental conditions. For each animal 3-5 matched brain sections were analyzed including the left and the right hippocampi and restricted to the dorsal hippocampus.

Either whole hippocampus, complete CA3 or complete CA1 were outlined by hand within the image quant program. The anterior-posterior level of brain sections analyzed were approximately 2.12 to 4.16 mm posterior to bregma (Paxinos & Watson, 1986). Radioactive standards exposed at the same time as the sections ensured that section intensity was within the linear range. Preliminary analyses showed little differences in mRNA expression levels across the anterior-posterior levels of the dorsal hippocampus; hence, we averaged the expression intensity of all sections for each rat. Because of occasional variability in hybridization, outliers were removed based on the formula  $median \pm 2(Q3-Q1)$ . Analysis of variance was used to determine significant differences between groups.

*Immunohistochemistry:* Aged and young rats were behaviorally characterized using the same protocol as for the microarray. Total N of 23 consisted of 8Y, 8AU, and 7AI. The rats were anesthetized with isoflurane and transcardially perfused with 0.1 M phosphate buffer saline (PBS) at room temperature followed by ice-cold 4% paraformaldehyde (PFA) in 0.1 M phosphate buffer (PB). Brains were removed and post-fixed in 4% PFA at 4°C for an additional 24 hr, and then transferred to 20% sucrose in 4% PFA at 4°C for another 24 hr. The brains were then stored at -80°C until sectioning. Blocks of brains containing the hippocampus were sectioned at 40 µm thickness, and stored free-floating in 4% PFA for at least 3 weeks. Histological sections were labeled with a commercially available Neuromab, monoclonal antibody against Kv4.2 (1:500); Antibodies Inc., Davis, CA). Characteristic staining and antibody specificity has been previously demonstrated for the Kv4.2 antibody utilized (Varga et al., 2000). All tissue from each animal group



was processed concurrently (8Y, 8AU, 7AI). Free-floating sections were washed in 0.1M PBS at room temperature (5x10 min), incubated in 0.3% H<sub>2</sub>O<sub>2</sub> in 0.1M PBS (30 min), and then washed in 0.1M PBS (3x10 min). Tissue was then blocked in PBST (0.1 M PBS and 0.3% triton) and 6% normal goat serum (NGS) for 1 hr at room temperature and subsequently washed in 0.1M PBS (3x5 min). Tissue was then incubated for 72 hrs at 4°C with Kv4.2 antibody diluted in PBST (1:500 antibody dilution, 0.1 M PBS and 0.15% triton) with 3% NGS. Tissue sections were removed from antibody dilution, rinsed in 0.1M PBS (4x5 min), and incubated for 1 hr at room temperature with goat anti-mouse secondary antibody (1:250 antibody dilution; Vector Laboratories.) in PBST (0.1 M PBS and 0.15% triton) with 3% NGS. Sections were washed in 0.1M PBS (3x10 min), incubated in ABC reagent (Vector Laboratories) in 0.1M PBS for 1 hr, and then rinsed in 0.1M PBS (3x10 min). Tissue was then color reacted with DAB (Vector Laboratories), given a final rise in 0.1M PBS (3x10 min), and then mounted on slides and left to dry for 24 hrs at room temperature and then oven dried for 24 hrs. Slides were coverslipped using a xylene-based medium and stored until analysis. Analyses were restricted to the dorsal hippocampus. The anterior-posterior level of brain sections analyzed was approximately 2.80 to 3.30 mm posterior to bregma (Paxinos & Watson, 1986). For each rat, hippocampi were analyzed across 3-4 matched sections, including the left and right hippocampi. Protein expression levels were quantified for each animal with the open source program ImageJ. The subregion of interest was outlined by a researcher who was blind to group conditions. Furthermore, a pixel by pixel analysis of protein expression for each animal was taken from a 150µm section in CA3b in a soma-dendritic pattern to observe levels of Kv4.2 expression along the dendritic trajectory from soma to stratum

lacunosum-moleculare. Four points of protein expression along this path, corresponding to important anatomical markers for the pyramidal cell body, stratum lucidum-stratum radiatum border, stratum radiatum, and stratum lacunosum-moleculare, were compared between groups. Tissue sections were averaged to obtain a single expression score for each animal and data was statistically analyzed with a one-way ANOVA (regional analysis) and two-way repeated measures ANOVA (CA3b dendritic analysis). Post-hoc analyses were conducted using a set of predetermined Scheffe's contrasts, corrected for multiple comparisons.

#### **Supplemental References:**

- Gallagher M, Colantuoni C, Eichenbaum H, Haberman RP, Rapp PR, Tanila H, Wilson IA (2006) Individual differences in neurocognitive aging of the medial temporal lobe. *AGE: Journal of the American Aging Association* 28:221-223.
- Irizarry RA, Hobbs B, Collin F, Beazer-Barclay YD, Antonellis KJ, Scherf U, Speed TP (2003) Exploration, normalization, and summaries of high density oligonucleotide array probe level data. *Biostatistics* 4:249-264.
- Tusher VG, Tibshirani R, Chu G (2001) Significance analysis of microarrays applied to the ionizing radiation response. *Proc Natl Acad Sci U S A* 98:5116-5121.
- Varga AW, Anderson AE, Adams JP, Vogel H, Sweatt JD (2000) Input-specific immunolocalization of differentially phosphorylated Kv4.2 in the mouse brain. *Learn Mem* 7:321-332.

Zeng G (1998) Sticky-end PCR: new method for subcloning. *Biotechniques* 25:206-208.

**Supplemental Figure legends:**

**Figure S1:** Hidden platform watermaze training data for all rats included in the microarray analysis. Performance on the first training trial does not differ between aged and young rats, as indicated by cumulative search error, but during training aged rats exhibit poorer learning. Repeated measures anova confirms highly significant group and trial differences (all  $p < 0.0001$ ). Error bars indicate standard error of the mean.

**Figure S2: A.** Global data analysis by multidimensional scaling (MDS). Each point within the graph represents a single array colored by cognitive group (Y, black; AU, red; AI, blue) and distance between points is an indication of relative similarity of mRNA profiles. As with PCA, AU subjects form a distinct group, separated along both dimensions, from both young and aged impaired in CA3. In CA1 AU arrays fall in between AI and Y. The middle panel (CA3) has been reprinted with permission from Gallagher et al (2006). **B.** Graphical visualization of SAM d-statistic distributions illustrates significant CA3 expression changes associated with aging. The density of observed d-statistic distributions (black lines) were plotted for the chronological age comparison consisting of all aged subjects compared to Y (AI+AU v Y) for each subregion. The distribution expected by chance (green line) was used to determine the

false detection rate (FDR; see methods for details). Dotted vertical lines to the left and right demarcate the point beyond which the false detection rate is 5%. Differentially expressed probe sets exceeding this FDR are represented by the shaded space between the green and black lines to the outside of the dotted lines and the numbers are noted on each graph. Numbers on the x-axis to the right (positive d-stat) indicate increased expression and numbers to the left (negative d-stat) indicate decreased expression in all aged subjects.

**Figure S3.** In situ hybridization analysis of *Tcp1* and *Hspa5/BiP*. Images of representative matched sections hybridized to radiolabeled *Tcp1* (Left column) or *Hspa5/BiP* (right column) probe and exposed to film. Images were pseudocolored to better define expression differences. Intensity scale is depicted below the images.

**Figure S4.** Immunohistochemical analysis of Kv4.2 protein. Images of representative young, aged unimpaired and aged impaired hippocampal sections stained with antibody to Kv4.2. Box delineates the area analyzed in Figure 6C.

**Table S1.** Functional groups analysis for chronological age comparison (AI+AU v Y) for each subregion: GO, Kegg, Pfam and protein binding groups with p<0.001.

| Group ID <sup>a</sup> | Group name                              | Direction <sup>b</sup> | WRSp <sup>c</sup> |
|-----------------------|-----------------------------------------|------------------------|-------------------|
| <b>CA3</b>            |                                         |                        |                   |
| GO:0006414            | translational elongation                | Up                     | 0.00              |
| Kegg03010             | Ribosome                                | Up                     | 0.00              |
| GO:0003735            | structural constituent of ribosome      | Up                     | 0.00              |
| GO:0022627            | cytosolic small ribosomal subunit       | Up                     | 6.88E-14          |
| GO:0005840            | ribosome                                | Up                     | 7.09E-13          |
| GO:0006412            | translation                             | Up                     | 1.19E-11          |
| GO:0005764            | lysosome                                | Up                     | 1.44E-08          |
| GO:0005576            | extracellular region                    | Up                     | 1.17E-06          |
| Kegg04610             | Complement and coagulation cascades     | Up                     | 7.18E-06          |
| GO:0005245            | voltage-gated calcium channel activity  | Down                   | 1.54E-05          |
| PB:1508               | CTSB                                    | Up                     | 2.57E-05          |
| PF00118               | TCP-1/cpn60 chaperonin family           | Down                   | 3.01E-05          |
| PB:7203               | CCT3                                    | Down                   | 3.24E-05          |
| PF00112               | Papain family cysteine protease         | Up                     | 3.40E-05          |
| PB:9051               | PSTPIP1                                 | Up                     | 3.83E-05          |
| GO:0005615            | extracellular space                     | Up                     | 4.18E-05          |
| GO:0051246            | regulation of protein metabolic process | Down                   | 4.39E-05          |
| Kegg04060             | Cytokine-cytokine receptor interaction  | Up                     | 4.87E-05          |
| PF00096               | Zinc finger, C2H2 type                  | Up                     | 6.79E-05          |
| GO:0005891            | voltage-gated calcium channel complex   | Down                   | 8.38E-05          |
| GO:0004364            | glutathione transferase activity        | Up                     | 0.00010           |
| GO:0019843            | rRNA binding                            | Up                     | 0.00013           |
| PB:5347               | PLK1                                    | Down                   | 0.00015           |
| PB:4113               | MAGEB2                                  | Up                     | 0.00016           |

|            |                                                                 |      |         |
|------------|-----------------------------------------------------------------|------|---------|
| GO:0005643 | nuclear pore                                                    | Down | 0.00016 |
| PB:7555    | CNBP                                                            | Up   | 0.00018 |
| Kegg00480  | Glutathione metabolism                                          | Up   | 0.00018 |
| Kegg03050  | Proteasome                                                      | Down | 0.00019 |
| PF01023    | S-100/ICaBP type calcium binding domain                         | Up   | 0.00020 |
| GO:0003674 | molecular_function                                              | Up   | 0.00021 |
| GO:0006355 | regulation of transcription, DNA-dependent                      | Up   | 0.00024 |
| PF00244    | 14-3-3 protein                                                  | Down | 0.00024 |
| PF00179    | Ubiquitin-conjugating enzyme                                    | Down | 0.00025 |
| GO:0004714 | transmembrane receptor protein tyrosine kinase activity         | Up   | 0.00028 |
| GO:0030117 | membrane coat                                                   | Down | 0.00030 |
| GO:0000028 | ribosomal small subunit assembly and maintenance                | Up   | 0.00030 |
| GO:0007268 | synaptic transmission                                           | Down | 0.00031 |
| GO:0008150 | biological_process                                              | Up   | 0.00035 |
| PB:712     | C1QA                                                            | Up   | 0.00036 |
| GO:0006606 | protein import into nucleus                                     | Down | 0.00038 |
| GO:0007269 | neurotransmitter secretion                                      | Down | 0.00043 |
| GO:0019787 | small conjugating protein ligase activity                       | Down | 0.00047 |
| PB:9610    | RIN1                                                            | Down | 0.00048 |
| GO:0005737 | cytoplasm                                                       | Down | 0.00050 |
| PB:7187    | TRAF3                                                           | Down | 0.00051 |
| PB:10808   | HSPH1                                                           | Down | 0.00056 |
| PB:22933   | SIRT2                                                           | Down | 0.00059 |
| PF00178    | Ets-domain                                                      | Up   | 0.00064 |
| PB:2       | A2M                                                             | Up   | 0.00064 |
| GO:0046961 | hydrogen ion transporting ATPase activity, rotational mechanism | Down | 0.00069 |
| PF08246    | Cathepsin propeptide inhibitor domain (I29)                     | Up   | 0.00072 |
| PB:5923    | RASGRF1                                                         | Down | 0.00075 |

|            |                                              |      |         |
|------------|----------------------------------------------|------|---------|
| PB:4140    | MARK3                                        | Down | 0.00079 |
| Kegg00980  | Metabolism of xenobiotics by cytochrome P450 | Up   | 0.00080 |
| GO:0006817 | phosphate transport                          | Up   | 0.00081 |
| PF01556    | DnaJ C terminal region                       | Down | 0.00081 |
| PF00498    | FHA domain                                   | Up   | 0.00086 |
| PB:5894    | RAF1                                         | Down | 0.00086 |
| Kegg00190  | Oxidative phosphorylation                    | Down | 0.00091 |
| GO:0043169 | cation binding                               | Up   | 0.00093 |
| GO:0043687 | post-translational protein modification      | Down | 0.00096 |
| GO:0019904 | protein domain specific binding              | Down | 0.00096 |
| PB:4686    | NCBP1                                        | Down | 0.00098 |
| GO:0005164 | tumor necrosis factor receptor binding       | Up   | 0.00098 |

---

### CA1

---

|            |                                    |      |          |
|------------|------------------------------------|------|----------|
| GO:0006414 | translational elongation           | Up   | 0        |
| Kegg03010  | Ribosome                           | Up   | 0        |
| GO:0003735 | structural constituent of ribosome | Up   | 0        |
| GO:0005840 | ribosome                           | Up   | 4.44E-16 |
| GO:0022627 | cytosolic small ribosomal subunit  | Up   | 2.15E-12 |
| GO:0006412 | translation                        | Up   | 4.48E-12 |
| GO:0005764 | lysosome                           | Up   | 3.36E-11 |
| GO:0005739 | mitochondrion                      | Up   | 1.08E-09 |
| GO:0055114 | oxidation reduction                | Up   | 2.18E-08 |
| GO:0016491 | oxidoreductase activity            | Up   | 3.41E-07 |
| GO:0006979 | response to oxidative stress       | Up   | 2.17E-06 |
| GO:0006629 | lipid metabolic process            | Up   | 4.16E-06 |
| GO:0006749 | glutathione metabolic process      | Up   | 4.40E-06 |
| Kegg00071  | Fatty acid metabolism              | Up   | 7.50E-06 |
| Kegg00480  | Glutathione metabolism             | Up   | 8.96E-06 |
| Kegg04360  | Axon guidance                      | Down | 9.51E-06 |

|            |                                                           |      |          |
|------------|-----------------------------------------------------------|------|----------|
| Kegg00980  | Metabolism of xenobiotics by cytochrome P450              | Up   | 9.77E-06 |
| Kegg04610  | Complement and coagulation cascades                       | Up   | 9.96E-06 |
| Kegg01032  | Glycan structures - degradation                           | Up   | 1.87E-05 |
| GO:0005829 | cytosol                                                   | Up   | 1.94E-05 |
| GO:0008152 | metabolic process                                         | Up   | 2.67E-05 |
| PB:8648    | NCOA1                                                     | Down | 3.06E-05 |
| GO:0004364 | glutathione transferase activity                          | Up   | 5.66E-05 |
| Kegg00280  | Valine, leucine and isoleucine degradation                | Up   | 8.56E-05 |
| GO:0006817 | phosphate transport                                       | Up   | 0.00010  |
| GO:0005164 | tumor necrosis factor receptor binding                    | Up   | 0.00013  |
| GO:0043169 | cation binding                                            | Up   | 0.00014  |
| Kegg00982  | Drug metabolism - cytochrome P450                         | Up   | 0.00014  |
| Kegg00511  | N-Glycan degradation                                      | Up   | 0.00014  |
| GO:0005884 | actin filament                                            | Up   | 0.00016  |
| GO:0005975 | carbohydrate metabolic process                            | Up   | 0.00018  |
| GO:0042612 | MHC class I protein complex                               | Up   | 0.00021  |
| GO:0003674 | molecular_function                                        | Up   | 0.00023  |
| PF00129    | Class I Histocompatibility antigen, domains alpha 1 and 2 | Up   | 0.00025  |
| GO:0043295 | glutathione binding                                       | Up   | 0.00026  |
| PF00229    | TNF(Tumour Necrosis Factor) family                        | Up   | 0.00029  |
| GO:0007040 | lysosome organization and biogenesis                      | Up   | 0.00029  |
| Kegg04540  | Gap junction                                              | Down | 0.00032  |
| Kegg00640  | Propanoate metabolism                                     | Up   | 0.00032  |
| PB:7203    | CCT3                                                      | Down | 0.00035  |
| PF07654    | Immunoglobulin C1-set domain                              | Up   | 0.00041  |
| Kegg04310  | Wnt signaling pathway                                     | Down | 0.00043  |
| GO:0006955 | immune response                                           | Up   | 0.00043  |
| PF00191    | Annexin                                                   | Up   | 0.00045  |
| PF00112    | Papain family cysteine protease                           | Up   | 0.00048  |



|            |                                                                        |      |         |
|------------|------------------------------------------------------------------------|------|---------|
| PF06623    | MHC_I C-terminus                                                       | Up   | 0.00051 |
| GO:0006508 | proteolysis                                                            | Up   | 0.00051 |
| PF00788    | Ras association (RalGDS/AF-6) domain                                   | Up   | 0.00053 |
| PB:23523   | CABIN1                                                                 | Down | 0.00053 |
| GO:0006958 | complement activation, classical pathway                               | Up   | 0.00062 |
| PB:5599    | MAPK8                                                                  | Up   | 0.00073 |
| GO:0016272 | prefoldin complex                                                      | Up   | 0.00075 |
| GO:0003702 | RNA polymerase II transcription factor activity                        | Up   | 0.00077 |
| PF03179    | Vacuolar (H <sup>+</sup> )-ATPase G subunit                            | Up   | 0.00080 |
| PB:4113    | MAGEB2                                                                 | Up   | 0.00082 |
| GO:0005643 | nuclear pore                                                           | Down | 0.00083 |
| GO:0009055 | electron carrier activity                                              | Up   | 0.00088 |
| GO:0002474 | antigen processing and presentation of peptide antigen via MHC class I | Up   | 0.00090 |
| PF00118    | TCP-1/cpn60 chaperonin family                                          | Down | 0.00091 |
| GO:0008150 | Biological process                                                     | Up   | 0.00098 |

---

### Dentate Gyrus

---

|            |                                                                        |      |          |
|------------|------------------------------------------------------------------------|------|----------|
| PF07654    | Immunoglobulin C1-set domain                                           | Up   | 1.39E-05 |
| PB:1855    | DVL1                                                                   | Down | 2.58E-05 |
| GO:0042612 | MHC class I protein complex                                            | Up   | 2.96E-05 |
| PF00129    | Class I Histocompatibility antigen, domains alpha 1 and 2              | Up   | 3.41E-05 |
| GO:0006955 | immune response                                                        | Up   | 3.66E-05 |
| GO:0005164 | tumor necrosis factor receptor binding                                 | Up   | 4.09E-05 |
| GO:0002474 | antigen processing and presentation of peptide antigen via MHC class I | Up   | 4.65E-05 |
| PB:5757    | PTMA                                                                   | Down | 5.16E-05 |
| GO:0005743 | mitochondrial inner membrane                                           | Down | 5.45E-05 |
| PF00229    | TNF(Tumour Necrosis Factor) family                                     | Up   | 5.55E-05 |
| PB:338     | APOB                                                                   | Down | 8.28E-05 |
| GO:0048469 | cell maturation                                                        | Down | 9.32E-05 |

|            |                                                                                   |      |          |
|------------|-----------------------------------------------------------------------------------|------|----------|
| PB:7203    | CCT3                                                                              | Down | 9.73E-05 |
| PF00505    | HMG (high mobility group) box                                                     | Down | 0.00010  |
| GO:0005764 | lysosome                                                                          | Up   | 0.00010  |
| PF06623    | MHC_I C-terminus                                                                  | Up   | 0.00012  |
| GO:0019882 | antigen processing and presentation                                               | Up   | 0.00015  |
| PF00754    | F5/8 type C domain                                                                | Up   | 0.00015  |
| GO:0046873 | metal ion transmembrane transporter activity                                      | Up   | 0.00015  |
| GO:0005884 | actin filament                                                                    | Up   | 0.00016  |
| GO:0005576 | extracellular region                                                              | Up   | 0.00018  |
| PF00112    | Papain family cysteine protease                                                   | Up   | 0.00020  |
| GO:0006817 | phosphate transport                                                               | Up   | 0.00030  |
| PF00118    | TCP-1/cpn60 chaperonin family                                                     | Down | 0.00033  |
| GO:0008378 | galactosyltransferase activity                                                    | Up   | 0.00038  |
| Kegg01032  | Glycan structures - degradation                                                   | Up   | 0.00039  |
| GO:0019885 | antigen processing and presentation of endogenous peptide antigen via MHC class I | Up   | 0.00041  |
| GO:0047915 | ganglioside galactosyltransferase activity                                        | Up   | 0.00041  |
| PF03344    | Daxx Family                                                                       | Up   | 0.00041  |
| PF03849    | Transcription factor Tfb2                                                         | Up   | 0.00041  |
| PF05083    | LST-1 protein                                                                     | Up   | 0.00041  |
| PF08149    | BING4CT (NUC141) domain                                                           | Up   | 0.00041  |
| GO:0016272 | prefoldin complex                                                                 | Up   | 0.00043  |
| GO:0001891 | phagocytic cup                                                                    | Up   | 0.00043  |
| GO:0050681 | androgen receptor binding                                                         | Up   | 0.00054  |
| PF01556    | DnaJ C terminal region                                                            | Down | 0.00061  |
| PF01410    | Fibrillar collagen C-terminal domain                                              | Up   | 0.00065  |
| Kegg04530  | Tight junction                                                                    | Down | 0.00065  |
| GO:0008013 | beta-catenin binding                                                              | Down | 0.00071  |
| PF00157    | Pou domain - N-terminal to homeobox domain                                        | Up   | 0.00078  |
| GO:0001764 | neuron migration                                                                  | Down | 0.00080  |

|            |                                                   |      |         |
|------------|---------------------------------------------------|------|---------|
| PF02535    | ZIP Zinc transporter                              | Up   | 0.00085 |
| PF01391    | Collagen triple helix repeat (20 copies)          | Up   | 0.00087 |
| GO:0004519 | endonuclease activity                             | Up   | 0.00089 |
| GO:0042613 | MHC class II protein complex                      | Up   | 0.00092 |
| PF00993    | Class II histocompatibility antigen, alpha domain | Up   | 0.00092 |
| PB:1499    | CTNNB1                                            | Down | 0.00093 |
| PB:29993   | PACSIN1                                           | Up   | 0.00096 |
| PF03179    | Vacuolar (H <sup>+</sup> )-ATPase G subunit       | Up   | 0.00099 |

<sup>a</sup>GO, gene ontology; KEGG, Kyoto Encyclopedia of Genes and Genomes; PF, PFAM protein sequence motifs; PB, protein binding (NCBI protein-protein interactions based on human interactions)

<sup>b</sup>Indicates direction of change in aged subjects relative to young.

<sup>c</sup>Uncorrected Wilcox rank sum p-value.

**Table S2.** Numbers of probesets with p-value <0.05 for SAM analysis (left columns) or MAS5.0 analysis (right columns) for each comparison within each subregion.

| <b>Group Comparison</b> | <b>gcRMA (SAM<sub>p</sub>&lt;0.05)</b> |            |           | <b>MAS5.0 (Ttest<sub>p</sub>&lt;0.05)</b> |            |           |
|-------------------------|----------------------------------------|------------|-----------|-------------------------------------------|------------|-----------|
|                         | <b>CA1</b>                             | <b>CA3</b> | <b>DG</b> | <b>CA1</b>                                | <b>CA3</b> | <b>DG</b> |
| <b>AI+AU v Y</b>        | 2058                                   | 3392       | 1865      | 1512                                      | 3217       | 1955      |
| <b>AI v AU+Y</b>        | 1712                                   | 2924       | 1699      | 1325                                      | 3171       | 1739      |
| <b>AI v AU</b>          | 1265                                   | 1827       | 2045      | 826                                       | 2018       | 1912      |

**Table S3.** Functional groups analysis for age impaired comparison (AI v AU+Y) for each subregion: GO, Kegg, Pfam and protein binding groups with  $p < 0.001$ .

| Group ID <sup>a</sup> | Group name                                                      | Direction <sup>b</sup> | WRSp <sup>c</sup> |
|-----------------------|-----------------------------------------------------------------|------------------------|-------------------|
| <b>CA3</b>            |                                                                 |                        |                   |
| GO:0006414            | translational elongation                                        | Up                     | 0.00              |
| Kegg03010             | Ribosome                                                        | Up                     | 0.00              |
| GO:0022627            | cytosolic small ribosomal subunit                               | Up                     | 1.83E-10          |
| GO:0003735            | structural constituent of ribosome                              | Up                     | 4.03E-10          |
| GO:0005840            | ribosome                                                        | Up                     | 1.19E-08          |
| GO:0005764            | lysosome                                                        | Up                     | 1.14E-06          |
| GO:0005576            | extracellular region                                            | Up                     | 1.55E-06          |
| GO:0006412            | translation                                                     | Up                     | 1.80E-06          |
| Kegg04610             | Complement and coagulation cascades                             | Up                     | 1.42E-05          |
| GO:0005615            | extracellular space                                             | Up                     | 2.52E-05          |
| GO:0006817            | phosphate transport                                             | Up                     | 5.09E-05          |
| Kegg04060             | Cytokine-cytokine receptor interaction                          | Up                     | 6.49E-05          |
| GO:0051246            | regulation of protein metabolic process                         | Down                   | 8.63E-05          |
| GO:0019843            | rRNA binding                                                    | Up                     | 0.00010           |
| PF00244               | 14-3-3 protein                                                  | Down                   | 0.00014           |
| GO:0005245            | voltage-gated calcium channel activity                          | Down                   | 0.00016           |
| Kegg00190             | Oxidative phosphorylation                                       | Down                   | 0.00018           |
| PF00118               | TCP-1/cpn60 chaperonin family                                   | Down                   | 0.00022           |
| GO:0046961            | hydrogen ion transporting ATPase activity, rotational mechanism | Down                   | 0.00027           |
| PB:7203               | CCT3                                                            | Down                   | 0.00028           |
| PF00112               | Papain family cysteine protease                                 | Up                     | 0.00029           |
| GO:0009611            | response to wounding                                            | Up                     | 0.00032           |
| GO:0006955            | immune response                                                 | Up                     | 0.00032           |

|            |                                                                       |      |         |
|------------|-----------------------------------------------------------------------|------|---------|
| PF00386    | C1q domain                                                            | Up   | 0.00033 |
| PB:1508    | CTSB                                                                  | Up   | 0.00042 |
| PB:3952    | LEP                                                                   | Up   | 0.00045 |
| GO:0015992 | proton transport                                                      | Down | 0.00047 |
| GO:0016469 | proton-transporting two-sector ATPase complex                         | Down | 0.00048 |
| GO:0019882 | antigen processing and presentation                                   | Up   | 0.00054 |
| PB:7187    | TRAF3                                                                 | Down | 0.00065 |
| PB:673     | BRAF                                                                  | Down | 0.00066 |
| Kegg00980  | Metabolism of xenobiotics by cytochrome P450                          | Up   | 0.00076 |
| GO:0004364 | glutathione transferase activity                                      | Up   | 0.00077 |
| PF01391    | Collagen triple helix repeat (20 copies)                              | Up   | 0.00081 |
| Kegg00982  | Drug metabolism - cytochrome P450                                     | Up   | 0.00085 |
| PB:5923    | RASGRF1                                                               | Down | 0.00092 |
| GO:0046933 | hydrogen ion transporting ATP synthase activity, rotational mechanism | Down | 0.00094 |
| PF01023    | S-100/ICaBP type calcium binding domain                               | Up   | 0.00094 |
| PF01556    | DnaJ C terminal region                                                | Down | 0.00099 |

---

### CA1

---

|            |                                    |    |          |
|------------|------------------------------------|----|----------|
| GO:0006414 | translational elongation           | Up | 0.00     |
| Kegg03010  | Ribosome                           | Up | 2.22E-15 |
| GO:0005764 | lysosome                           | Up | 3.48E-12 |
| GO:0055114 | oxidation reduction                | Up | 2.94E-11 |
| GO:0016491 | oxidoreductase activity            | Up | 1.67E-10 |
| GO:0003735 | structural constituent of ribosome | Up | 2.01E-10 |
| GO:0005840 | ribosome                           | Up | 8.84E-10 |
| GO:0005829 | cytosol                            | Up | 3.09E-09 |
| GO:0005739 | mitochondrion                      | Up | 6.21E-09 |
| GO:0022627 | cytosolic small ribosomal subunit  | Up | 1.07E-08 |
| GO:0006412 | translation                        | Up | 1.40E-08 |
| GO:0008152 | metabolic process                  | Up | 1.89E-08 |

|            |                                              |      |          |
|------------|----------------------------------------------|------|----------|
| GO:0006629 | lipid metabolic process                      | Up   | 6.98E-08 |
| Kegg00480  | Glutathione metabolism                       | Up   | 5.86E-07 |
| GO:0006817 | phosphate transport                          | Up   | 6.47E-07 |
| GO:0005625 | soluble fraction                             | Up   | 7.51E-07 |
| Kegg00071  | Fatty acid metabolism                        | Up   | 1.56E-06 |
| GO:0006749 | glutathione metabolic process                | Up   | 1.64E-06 |
| Kegg04060  | Cytokine-cytokine receptor interaction       | Up   | 6.99E-06 |
| Kegg00982  | Drug metabolism - cytochrome P450            | Up   | 8.74E-06 |
| Kegg00980  | Metabolism of xenobiotics by cytochrome P450 | Up   | 1.61E-05 |
| Kegg00010  | Glycolysis / Gluconeogenesis                 | Up   | 1.69E-05 |
| GO:0006979 | response to oxidative stress                 | Up   | 2.32E-05 |
| GO:0006955 | immune response                              | Up   | 3.04E-05 |
| GO:0005884 | actin filament                               | Up   | 6.78E-05 |
| PB:8648    | NCOA1                                        | Down | 6.89E-05 |
| PF00229    | TNF(Tumour Necrosis Factor) family           | Up   | 7.03E-05 |
| Kegg00590  | Arachidonic acid metabolism                  | Up   | 7.08E-05 |
| GO:0005164 | tumor necrosis factor receptor binding       | Up   | 7.97E-05 |
| Kegg04610  | Complement and coagulation cascades          | Up   | 8.82E-05 |
| GO:0006096 | glycolysis                                   | Up   | 9.25E-05 |
| GO:0006635 | fatty acid beta-oxidation                    | Up   | 0.00013  |
| GO:0006508 | proteolysis                                  | Up   | 0.00013  |
| GO:0016829 | lyase activity                               | Up   | 0.00015  |
| GO:0005759 | mitochondrial matrix                         | Up   | 0.00017  |
| PF01410    | Fibrillar collagen C-terminal domain         | Up   | 0.00018  |
| Kegg00280  | Valine, leucine and isoleucine degradation   | Up   | 0.00018  |
| PB:57180   | ACTR3B                                       | Down | 0.00019  |
| Kegg01032  | Glycan structures - degradation              | Up   | 0.00020  |
| Kegg00251  | Glutamate metabolism                         | Up   | 0.00024  |
| PF01391    | Collagen triple helix repeat (20 copies)     | Up   | 0.00025  |
| PF07654    | Immunoglobulin C1-set domain                 | Up   | 0.00025  |

|            |                                                                                   |      |         |
|------------|-----------------------------------------------------------------------------------|------|---------|
| GO:0042612 | MHC class I protein complex                                                       | Up   | 0.00026 |
| GO:0016272 | prefoldin complex                                                                 | Up   | 0.00027 |
| PB:821     | CANX                                                                              | Up   | 0.00033 |
| GO:0043295 | glutathione binding                                                               | Up   | 0.00034 |
| GO:0001891 | phagocytic cup                                                                    | Up   | 0.00039 |
| PF03179    | Vacuolar (H <sup>+</sup> )-ATPase G subunit                                       | Up   | 0.00039 |
| GO:0004364 | glutathione transferase activity                                                  | Up   | 0.00040 |
| GO:0000902 | cell morphogenesis                                                                | Up   | 0.00044 |
| PF01920    | Prefoldin subunit                                                                 | Up   | 0.00046 |
| PB:5599    | MAPK8                                                                             | Up   | 0.00047 |
| GO:0051287 | NAD binding                                                                       | Up   | 0.00047 |
| PB:476     | ATP1A1                                                                            | Up   | 0.00051 |
| GO:0042744 | hydrogen peroxide catabolic process                                               | Up   | 0.00051 |
| GO:0005615 | extracellular space                                                               | Up   | 0.00052 |
| Kegg00640  | Propanoate metabolism                                                             | Up   | 0.00054 |
| PF00129    | Class I Histocompatibility antigen, domains alpha 1 and 2                         | Up   | 0.00055 |
| PB:10097   | ACTR2                                                                             | Down | 0.00059 |
| PB:10109   | ARPC2                                                                             | Down | 0.00059 |
| PB:10094   | ARPC3                                                                             | Down | 0.00059 |
| PB:10093   | ARPC4                                                                             | Down | 0.00059 |
| GO:0000287 | magnesium ion binding                                                             | Up   | 0.00062 |
| PB:7067    | THRA                                                                              | Down | 0.00064 |
| Kegg00310  | Lysine degradation                                                                | Up   | 0.00065 |
| Kegg00511  | N-Glycan degradation                                                              | Up   | 0.00066 |
| GO:0014070 | response to organic cyclic substance                                              | Up   | 0.00067 |
| PB:6844    | VAMP2                                                                             | Up   | 0.00068 |
| GO:0019885 | antigen processing and presentation of endogenous peptide antigen via MHC class I | Up   | 0.00073 |
| GO:0047915 | ganglioside galactosyltransferase activity                                        | Up   | 0.00073 |



|            |                           |      |         |
|------------|---------------------------|------|---------|
| PF03344    | Daxx Family               | Up   | 0.00073 |
| PF03849    | Transcription factor Tfb2 | Up   | 0.00073 |
| PF05083    | LST-1 protein             | Up   | 0.00073 |
| PF08149    | BING4CT (NUC141) domain   | Up   | 0.00073 |
| GO:0008144 | drug binding              | Up   | 0.00080 |
| Kegg00120  | Bile acid biosynthesis    | Up   | 0.00082 |
| GO:0009055 | electron carrier activity | Up   | 0.00083 |
| PB:5578    | PRKCA                     | Up   | 0.00084 |
| PB:7068    | THRB                      | Down | 0.00085 |
| PF00169    | PH domain                 | Up   | 0.00086 |
| PB:6810    | STX4                      | Up   | 0.00086 |
| PF02373    | JmjC domain               | Down | 0.00089 |
| PB:3675    | ITGA3                     | Up   | 0.00090 |
| PF00884    | Sulfatase                 | Up   | 0.00099 |

---

### Dentate Gyrus

---

|            |                                                                                   |    |          |
|------------|-----------------------------------------------------------------------------------|----|----------|
| GO:0005164 | tumor necrosis factor receptor binding                                            | Up | 2.33E-06 |
| GO:0016272 | prefoldin complex                                                                 | Up | 2.50E-06 |
| PF00229    | TNF(Tumour Necrosis Factor) family                                                | Up | 4.58E-06 |
| GO:0005764 | lysosome                                                                          | Up | 7.64E-06 |
| GO:0005884 | actin filament                                                                    | Up | 2.50E-05 |
| PF00498    | FHA domain                                                                        | Up | 2.78E-05 |
| GO:0019885 | antigen processing and presentation of endogenous peptide antigen via MHC class I | Up | 4.16E-05 |
| GO:0047915 | ganglioside galactosyltransferase activity                                        | Up | 4.16E-05 |
| PF03344    | Daxx Family                                                                       | Up | 4.16E-05 |
| PF03849    | Transcription factor Tfb2                                                         | Up | 4.16E-05 |
| PF05083    | LST-1 protein                                                                     | Up | 4.16E-05 |
| PF08149    | BING4CT (NUC141) domain                                                           | Up | 4.16E-05 |
| PF03179    | Vacuolar (H <sup>+</sup> )-ATPase G subunit                                       | Up | 4.66E-05 |
| GO:0050681 | androgen receptor binding                                                         | Up | 5.49E-05 |

|            |                                                                           |      |          |
|------------|---------------------------------------------------------------------------|------|----------|
| PF00788    | Ras association (RalGDS/AF-6) domain                                      | Up   | 5.78E-05 |
| GO:0001891 | phagocytic cup                                                            | Up   | 7.40E-05 |
| PB:6643    | SNX2                                                                      | Up   | 8.14E-05 |
| PF00618    | Guanine nucleotide exchange factor for Ras-like GTPases; N-terminal motif | Up   | 0.00010  |
| GO:0042613 | MHC class II protein complex                                              | Up   | 0.00011  |
| PF00993    | Class II histocompatibility antigen, alpha domain                         | Up   | 0.00011  |
| GO:0000281 | cytokinesis after mitosis                                                 | Up   | 0.00012  |
| GO:0042612 | MHC class I protein complex                                               | Up   | 0.00013  |
| GO:0002474 | antigen processing and presentation of peptide antigen via MHC class I    | Up   | 0.00015  |
| PB:7203    | CCT3                                                                      | Down | 0.00016  |
| PF01920    | Prefoldin subunit                                                         | Up   | 0.00016  |
| GO:0016787 | hydrolase activity                                                        | Up   | 0.00022  |
| GO:0042803 | protein homodimerization activity                                         | Up   | 0.00022  |
| PF00112    | Papain family cysteine protease                                           | Up   | 0.00024  |
| GO:0046873 | metal ion transmembrane transporter activity                              | Up   | 0.00028  |
| PB:54453   | RIN2                                                                      | Up   | 0.00028  |
| Kegg01032  | Glycan structures - degradation                                           | Up   | 0.00029  |
| GO:0005625 | soluble fraction                                                          | Up   | 0.00029  |
| PF07654    | Immunoglobulin C1-set domain                                              | Up   | 0.00033  |
| GO:0003702 | RNA polymerase II transcription factor activity                           | Up   | 0.00039  |
| PB:10567   | RABAC1                                                                    | Up   | 0.00040  |
| PB:580     | BARD1                                                                     | Up   | 0.00040  |
| GO:0051017 | actin filament bundle formation                                           | Up   | 0.00042  |
| PF06623    | MHC_I C-terminus                                                          | Up   | 0.00043  |
| PF02535    | ZIP Zinc transporter                                                      | Up   | 0.00043  |
| Kegg00511  | N-Glycan degradation                                                      | Up   | 0.00044  |
| GO:0000792 | heterochromatin                                                           | Up   | 0.00046  |
| GO:0008378 | galactosyltransferase activity                                            | Up   | 0.00047  |

|            |                                                                  |      |         |
|------------|------------------------------------------------------------------|------|---------|
| PF00616    | GTPase-activator protein for Ras-like GTPase                     | Up   | 0.00061 |
| GO:0007169 | transmembrane receptor protein tyrosine kinase signaling pathway | Up   | 0.00061 |
| PF01762    | Galactosyltransferase                                            | Up   | 0.00064 |
| PB:112755  | STX1B                                                            | Up   | 0.00074 |
| Kegg01030  | Glycan structures - biosynthesis 1                               | Down | 0.00074 |
| GO:0003676 | Nucleic acid binding                                             | Up   | 0.00083 |
| Kegg05217  | Basal cell carcinoma                                             | Down | 0.00085 |
| PB:3191    | HNRNPL                                                           | Up   | 0.00085 |
| GO:0030154 | cell differentiation                                             | Up   | 0.00088 |
| PB:3953    | LEPR                                                             | Up   | 0.00091 |
| PF00129    | Class I Histocompatibility antigen, domains alpha 1 and 2        | Up   | 0.00097 |

<sup>a</sup>GO, gene ontology; KEGG, Kyoto Encyclopedia of Genes and Genomes; PF, PFAM protein sequence motifs ; PB, protein binding (NCBI protein-protein interactions)

<sup>b</sup>Indicates direction of change in aged impaired subjects relative to the combined group of young and aged unimpaired.

<sup>c</sup>Uncorrected Wilcox rank sum p-value.

Haberman et al, Figure S1

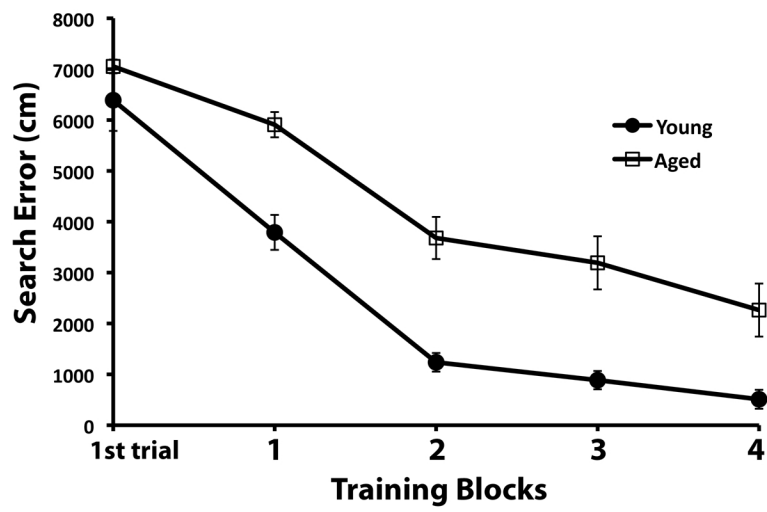

**A.**

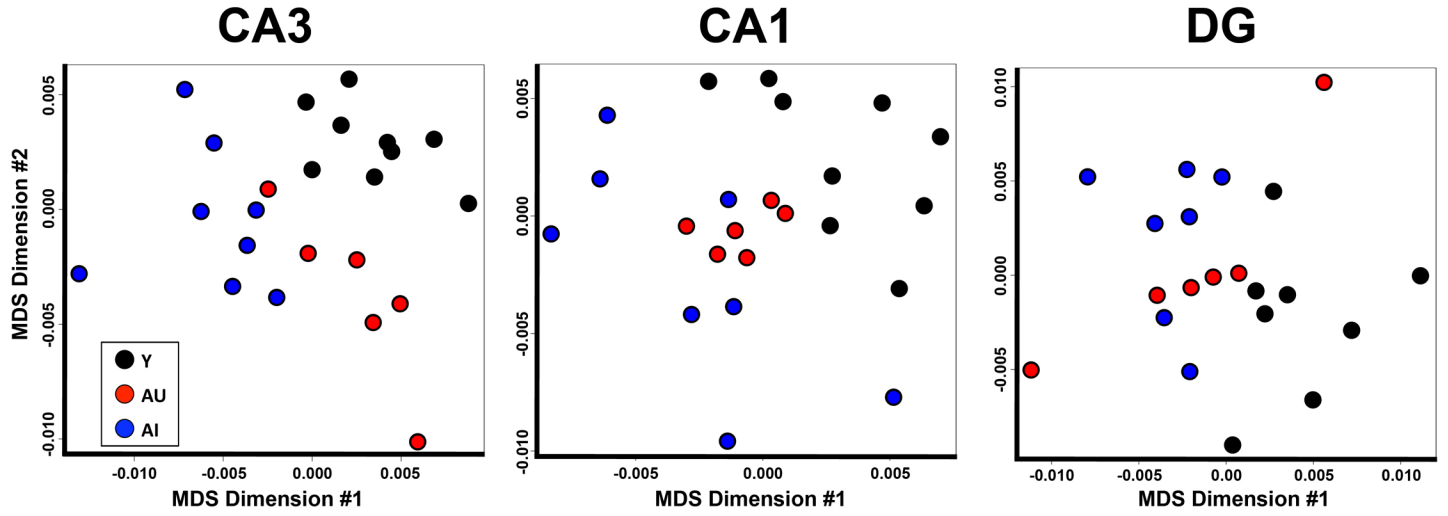

**B.**

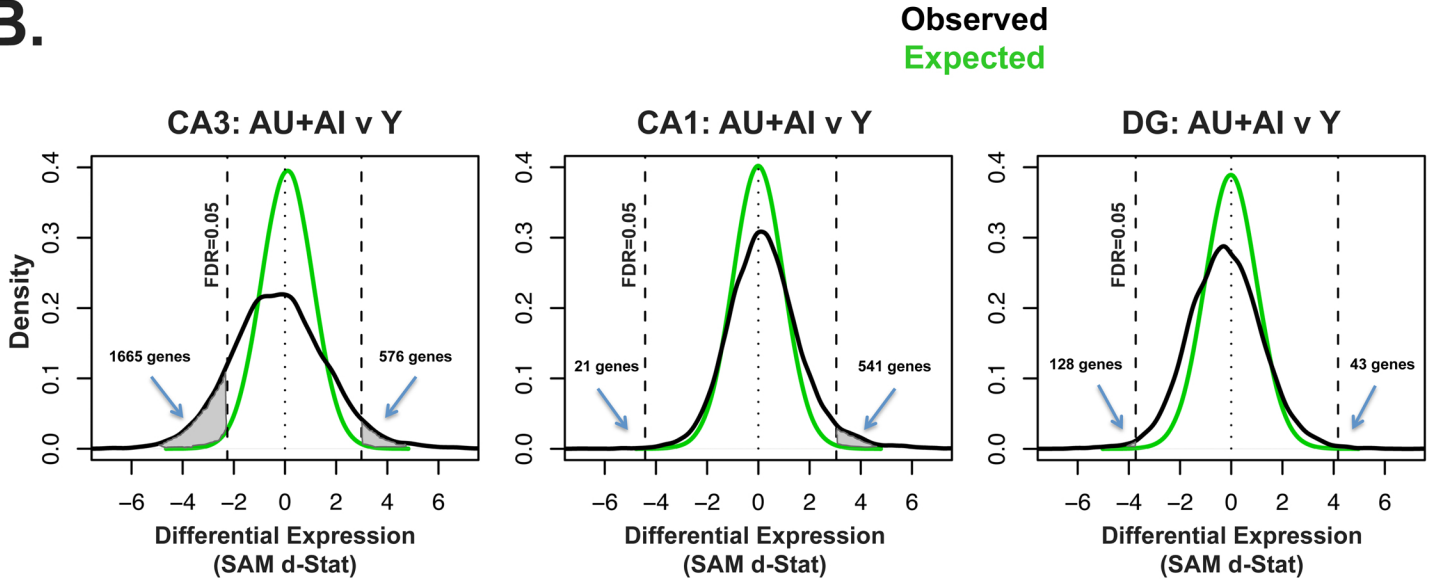

**Figure S3**

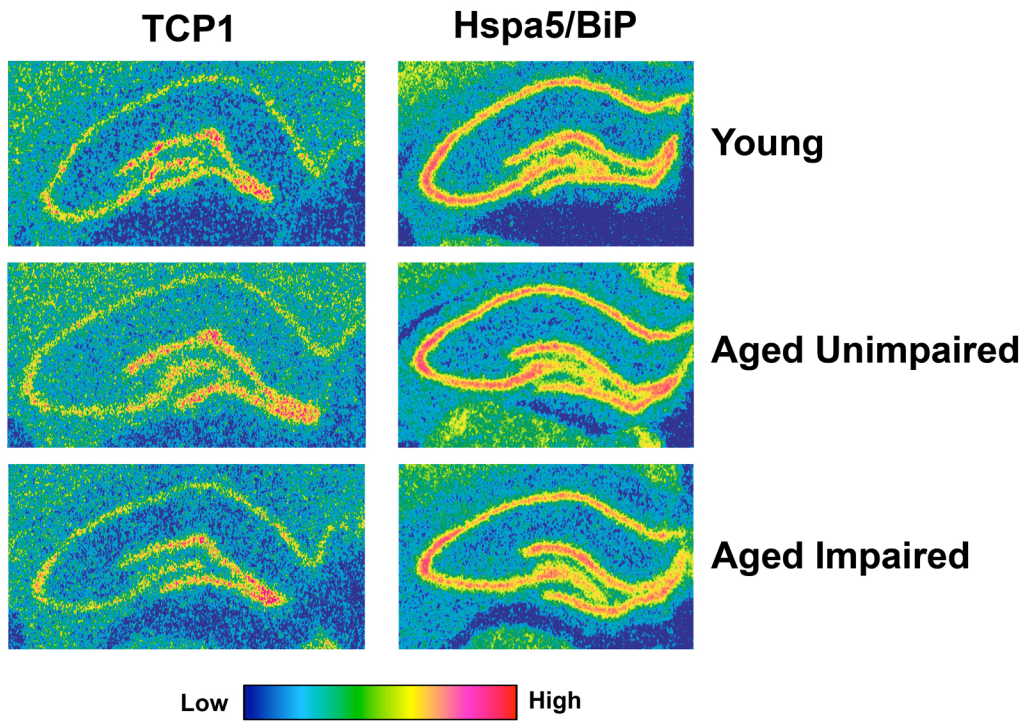

**Figure S4**

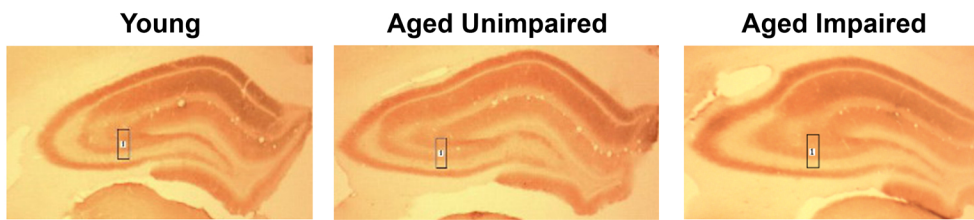

Supplement: NIHMS154006-supplement-01.pdf [file NIHMS154006-supplement-01.pdf]
